# Supplementary material
Source: publisher figshare collection journal article supplement (https://acs.figshare.com/ndownloader/files/18509144)
Supplement: Supplementary file 1 [file 18509144]

# **Distinguishing between Structural Models of $\beta'$ -sialons using a Combined Solid-State NMR, Powder XRD and Computational Approach**

V. R. Seymour<sup>1,2</sup> and M. E. Smith<sup>1,3</sup>

1. Department of Chemistry, Lancaster University, Bailrigg, Lancaster, LA1 4YB, UK
2. Materials Science Institute, Lancaster University, Bailrigg, Lancaster, LA1 4YB, UK
3. Vice-Chancellor's Office, University House, Lancaster University, Bailrigg, Lancaster, LA1 4YW, UK.

## **Supporting Information**

- S1. Structural parameters from diffraction and models for  $\beta'$ -sialons in the literature**
- S2. Previously reported solid-state NMR observations from  $\beta'$ -sialons**
- S3. Powder X-ray diffraction patterns**
- S4. Reference shieldings for DFT (CASTEP) calculations**
- S5.  $^{29}\text{Si}$  MAS NMR spectra**
- S6.  $^{27}\text{Al}$  MAS NMR spectra, 3Q projections and summary of 1D MAS NMR parameters**
- S7. Experimental and calculated cell parameters and volumes as a function of z in  $\beta'$ -sialons**
- S8. Calculated  $^{27}\text{Al}$  NMR interaction parameters for each individual model, their positions superimposed on 3Q MAS NMR and simulations of the MAS NMR spectra for possible different layer thicknesses**
- S9. Example SIMPSON input files**
- S10. References**

## S1. Structural parameters from diffraction and models for $\beta'$ -sialons in the literature

A structure for the parent  $\beta$ - $\text{Si}_3\text{N}_4$ <sup>1</sup> and structures for  $\text{Si}_{6-z}\text{Al}_z\text{O}_z\text{N}_{8-z}$  ( $z = 1, 2$ , and  $4$ ) were obtained from the literature.<sup>2,3</sup> The unit cell parameters are given in Table S1 and the unit cells for the  $\beta'$ -sialons are shown in Figure S1. These show the limitation of the diffraction methods used, where the site occupancy of the Al/Si and N/O atoms is averaged over the unit cell. The model  $\beta'$ -sialon structures of this work were based on the  $\beta$ - $\text{Si}_3\text{N}_4$  unit cell of Ref. 1. The models are named in reference to their Al/O distribution, and the composition of parent unit cells used to create the supercell required to accommodate the distribution. Domain 113 and Domain 116 are domain models with supercells of  $1 \times 1 \times 3$  and  $1 \times 1 \times 6$ , respectively; Plane 221 is a plane model with a supercell of  $2 \times 2 \times 1$ ; Channel 231 and Channel 331 are channel models with supercells of  $2 \times 3 \times 1$  and  $3 \times 3 \times 1$ , respectively. The models are shown in Figure S2, and the definition of a layer for the domain models is shown in Figure S3.

|   | Expt. parameters |      | Unit cell lengths (Å) |        | Angles (°) |     | Volume (Å³) | Ref (ICSD Code) | % difference from β-Si₃N₄ |      |      |
|---|------------------|------|-----------------------|--------|------------|-----|-------------|-----------------|---------------------------|------|------|
| Z | Temp.            | Type | a                     | c      | α          | γ   | V           |                 | a                         | c    | V    |
|   | T                | X/N  |                       |        |            |     |             |                 |                           |      |      |
| 0 | RT               | X    | 7.5950                | 2.9023 | 90         | 120 | 144.986794  | Ref. 1 (8263)   |                           |      |      |
| 1 | RT               | N    | 7.6072                | 2.9274 | 90         | 120 | 146.710907  | Ref. 2 (39496)  | 0.16                      | 0.86 | 1.19 |
| 2 | 4.2 K            | N    | 7.6430                | 2.9450 | 90         | 120 | 148.985380  | Ref. 3 (34288)  | 0.63                      | 1.47 | 2.76 |
| 4 | 4.2 K            | N    | 7.6920                | 2.9900 | 90         | 120 | 153.207619  | Ref. 3 (34287)  | 1.28                      | 3.02 | 5.67 |
| 2 | 300 K            | N    | 7.649                 | 2.950  | 90         | 120 | 149.472740  | Ref. 3          | 0.71                      | 1.64 | 3.09 |
| 4 | 300 K            | N    | 7.695                 | 2.995  | 90         | 120 | 153.583553  | Ref. 3          | 1.32                      | 3.19 | 5.93 |

**Table S1:** Experimental unit cell parameters taken from the literature for  $\beta'$ -sialon structures. (X = X-ray diffraction data, N = Neutron diffraction data)

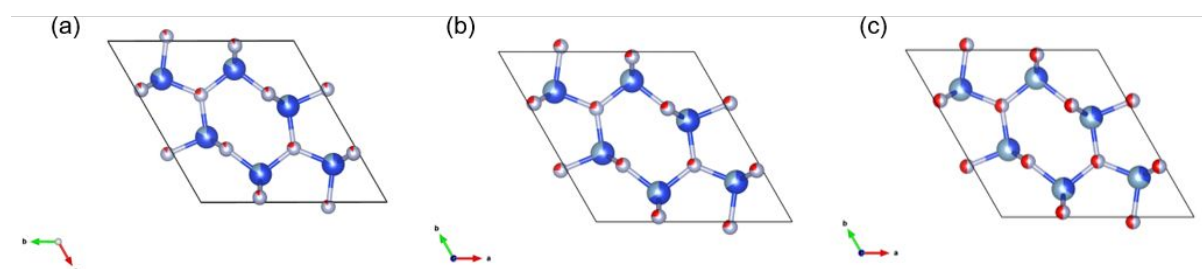

**Figure S1:** Crystal structures of  $\beta'$ -sialons shown as unit cells with atoms (Al (light blue), Si (blue), O (red) and N (grey)) depicted as pie charts indicating site occupancy, averaged over the structure, (a)  $z = 1$ ,<sup>2</sup> (b)  $z = 2$  and (c)  $z = 4$ .<sup>3</sup> Unit cell figures were created using VESTA.<sup>4</sup>

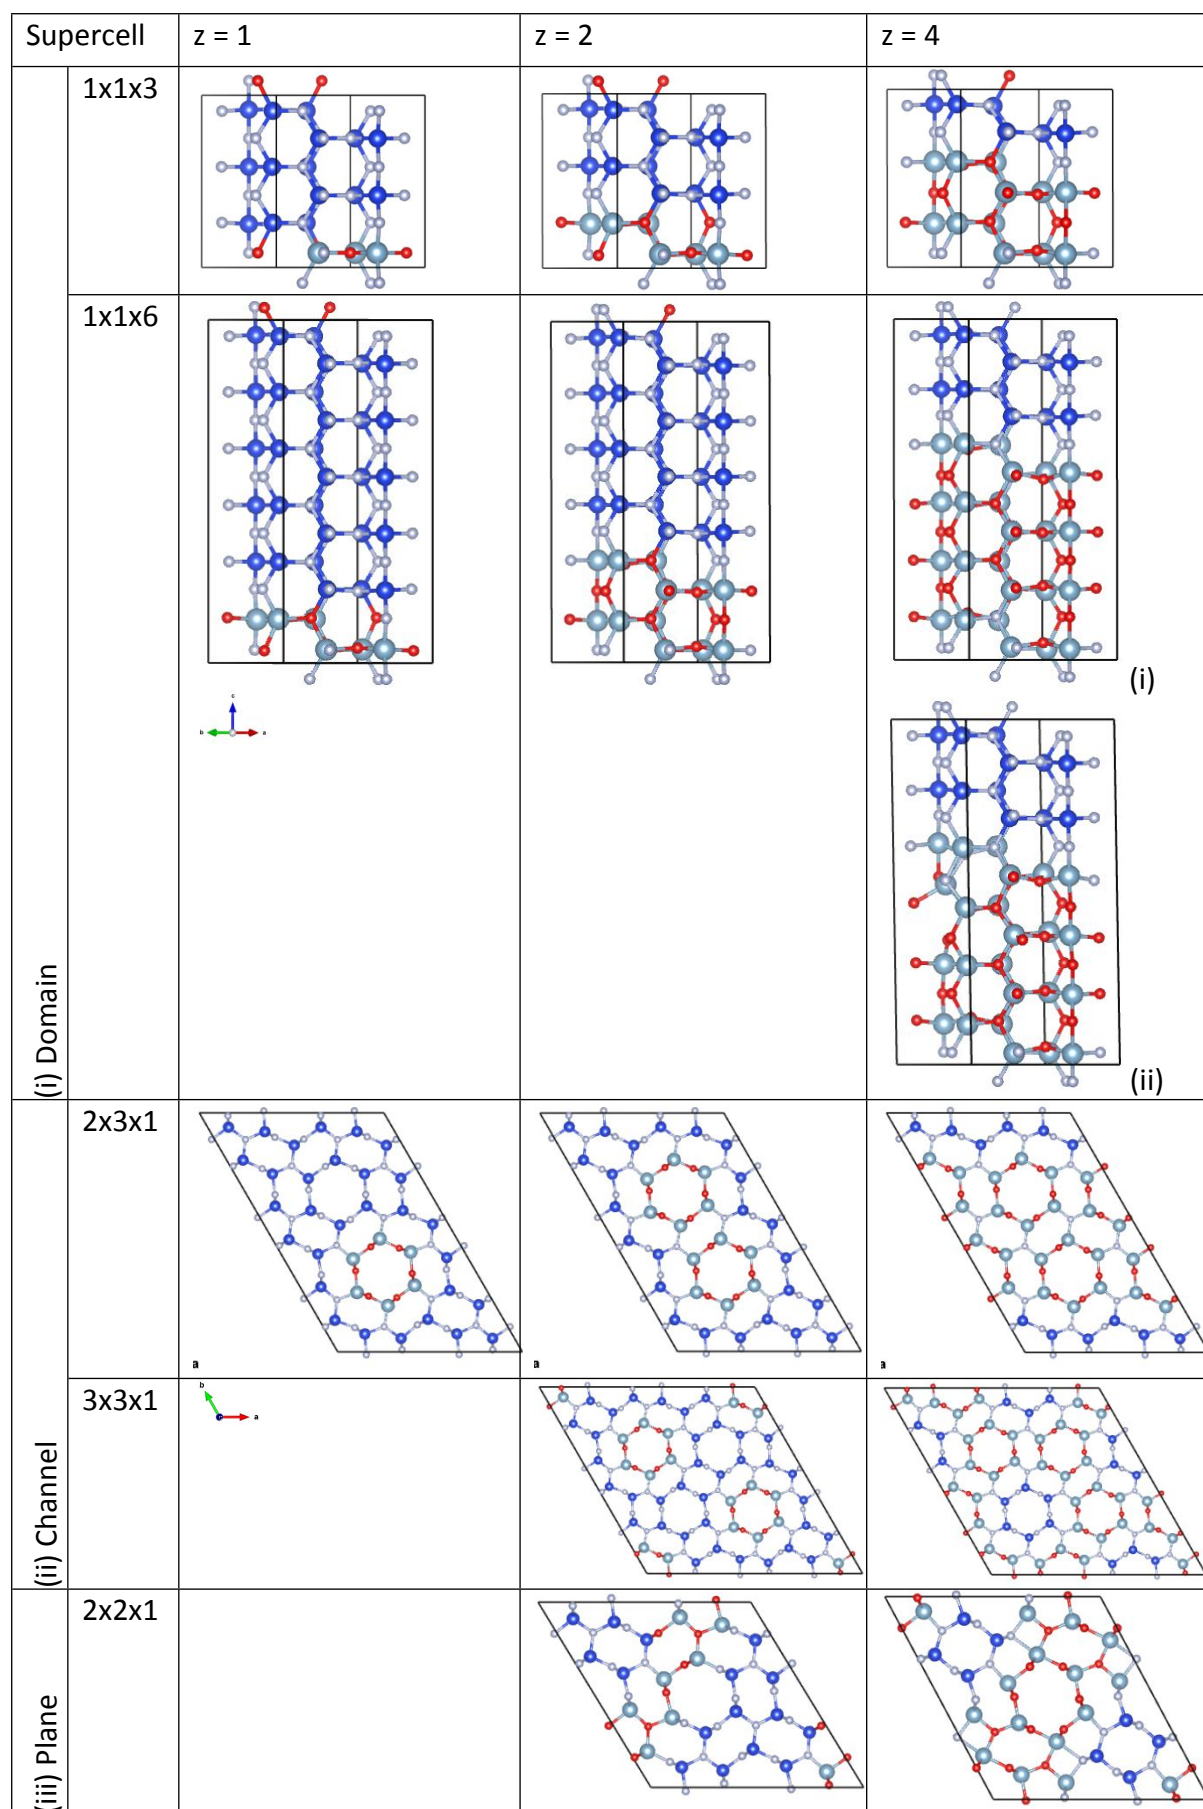

**Figure S2:** Unit cells of  $\beta'$ -sialon models, showing distribution of Al (light blue), Si (blue), O (red) and N (grey).

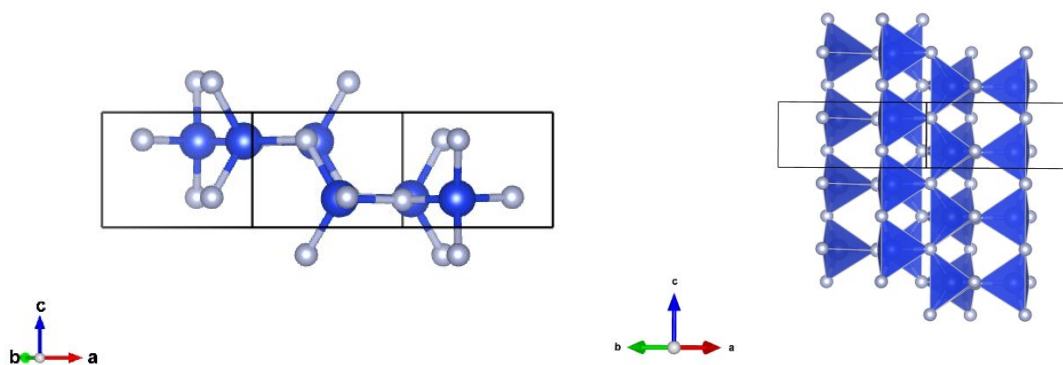

**Figure S3:** Unit cell of  $\beta$ - $\text{Si}_3\text{N}_4$ , showing the definition of a layer for the domain models. Layer = one unit cell of  $\beta$ - $\text{Si}_3\text{N}_4$  (which contains  $\text{Si}_6\text{N}_8$ ).

## S2. Previously reported solid-state NMR observations from $\beta'$ -sialons

|                                      | NMR Reference                                 |
|--------------------------------------|-----------------------------------------------|
| $\beta$ - $\text{Si}_3\text{N}_4$    | $^{15}\text{N}^5$ , $^{29}\text{Si}^{6-8}$    |
| $\beta'$ -, $z = 0.05, 0.075, 0.125$ | $^{27}\text{Al}^9$                            |
| $\beta'$ -sialon, $z = 0.25$         | $^{27}\text{Al}^{10}$                         |
| $\beta'$ -sialon, $z = 0.6, 0.9$     | $^{15}\text{N}^{10}$ , $^{29}\text{Si}^{10}$  |
| $\beta'$ -sialon, $z = 1$            | $^{27}\text{Al}^{11,12}$ , $^{29}\text{Si}^6$ |
| $\beta'$ -sialon, $z = 2$            | $^{27}\text{Al}^{11,12}$                      |
| $\beta'$ -sialon, $z = 2.7$          | $^{27}\text{Al}^{10}$ , $^{29}\text{Si}^{10}$ |
| $\beta'$ -sialon, $z = 4$            | $^{27}\text{Al}^{11,12}$ , $^{29}\text{Si}^6$ |

**Table S2.** Summary of references of previous reports of solid-state NMR from  $\beta'$ -sialons.

### S3. Powder X-ray diffraction patterns

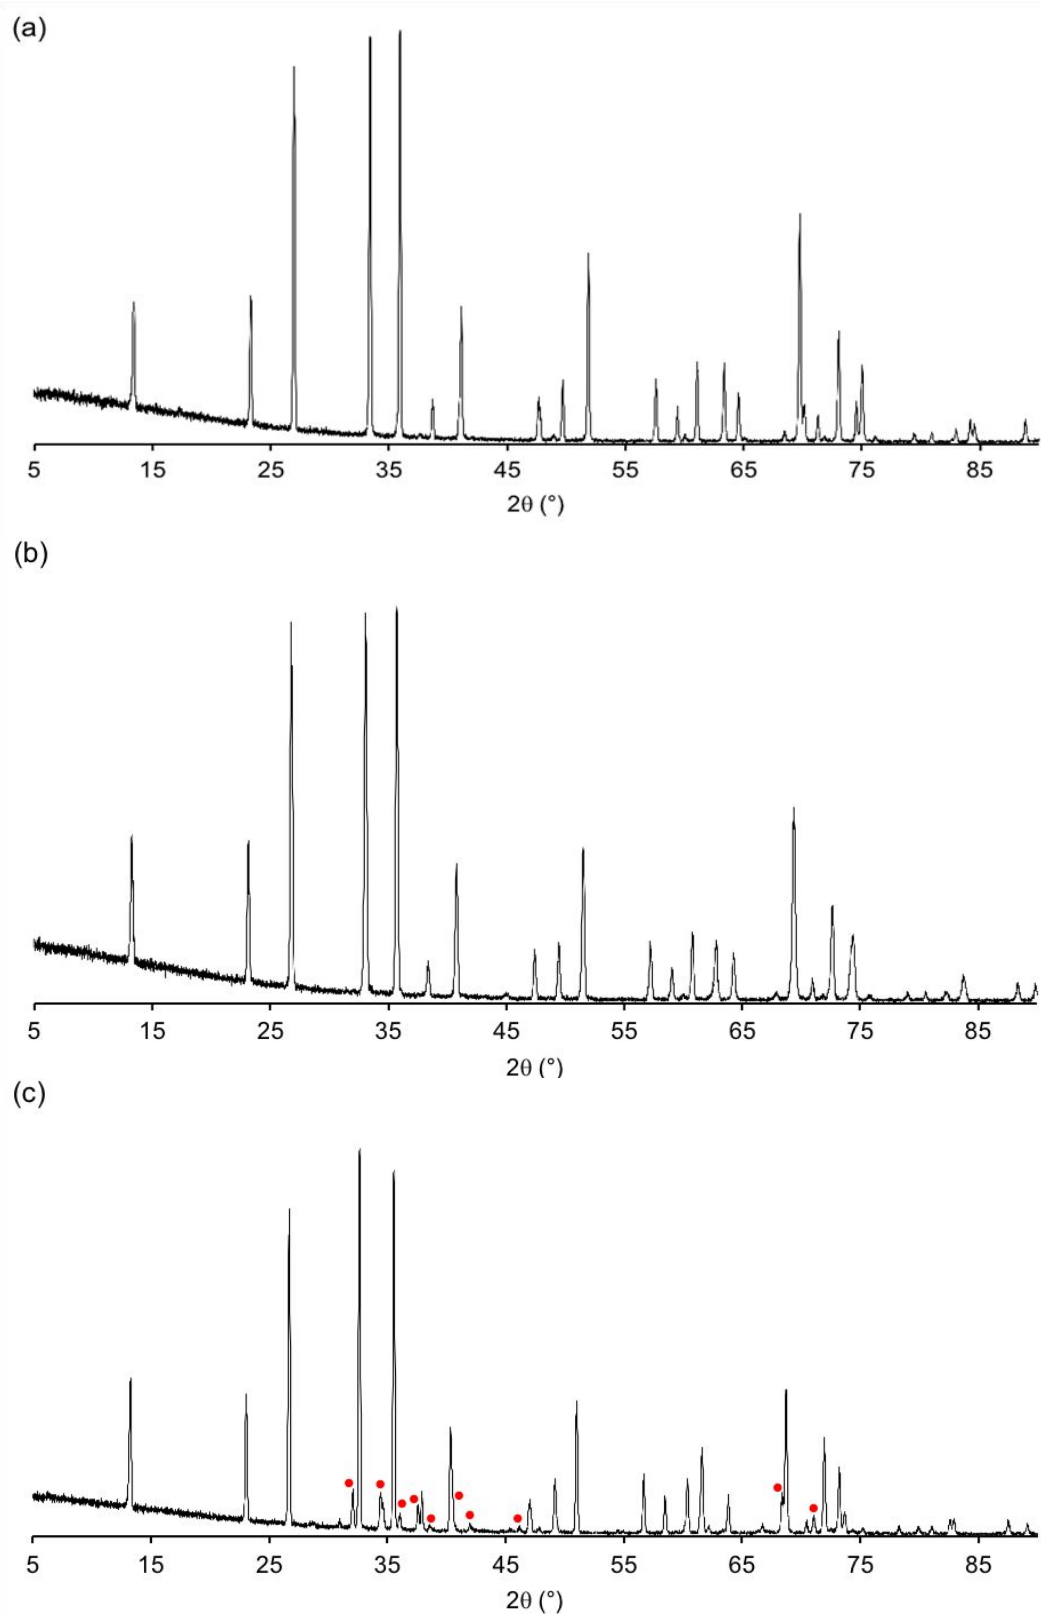

**Figure S4:** XRD of  $\beta'$ -sialon materials,  $\text{Si}_{6-z}\text{Al}_z\text{O}_z\text{N}_{8-z}$ , (a)  $z = 1$ , (b)  $z = 2$ , and (c)  $z = 4$ . Red dots in (c) indicate impurity peaks. The impurity in the  $z = 4$  sample is identified by XRD and solid-state NMR as 15R polytypoid.

#### S4. Reference shieldings for DFT (CASTEP) calculations

Reference shielding,  $\sigma_{\text{ref}}$ , values were determined using model compounds and comparing calculated NMR parameters to literature NMR parameters.<sup>6,11,13</sup> For  $^{27}\text{Al}$ : AlN (wurtzite),  $\text{Al}_2\text{O}_3$  (corundum), and  $\text{Al}_2\text{SiO}_5$  (andalusite) were used (ICSD codes: 54697, 73724, and 172725, respectively). For  $^{29}\text{Si}$ :  $\text{SiO}_2$  (quartz),  $\beta\text{-Si}_3\text{N}_4$ ,  $\alpha\text{-Si}_3\text{N}_4$ , and  $\text{Al}_2\text{SiO}_5$  (andalusite) were used (ICSD codes: 41412, 8263, 90146, and 73724, respectively). The isotropic chemical shift,  $\delta_{\text{iso}}$ , is obtained from  $-(\sigma_{\text{iso}} - \sigma_{\text{ref}})$ .

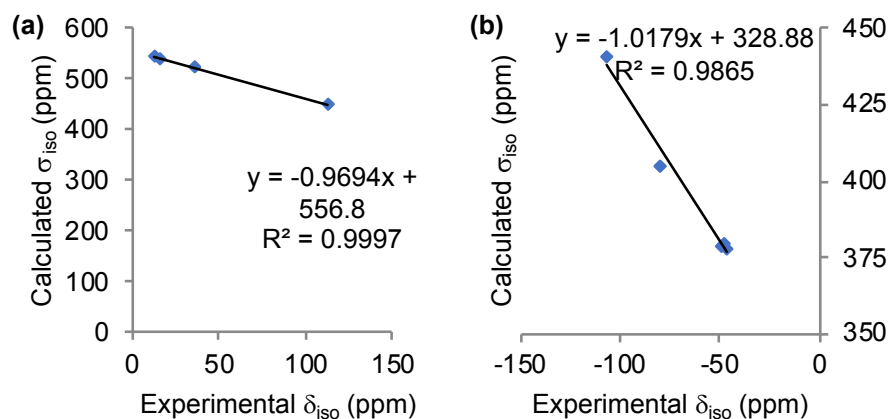

**Figure S5:** Plot of calculated (CASTEP)  $\sigma_{\text{iso}}$  vs experimental (literature)  $\delta_{\text{iso}}$  for a sets of model systems for (a)  $^{27}\text{Al}$  and (b)  $^{29}\text{Si}$ .

## S5. $^{29}\text{Si}$ MAS NMR spectra

The  $^{29}\text{Si}$  MAS NMR spectra for the  $\beta'$ -sialons are shown in Figure S6. These show a peak position of approximately  $-48$  ppm.

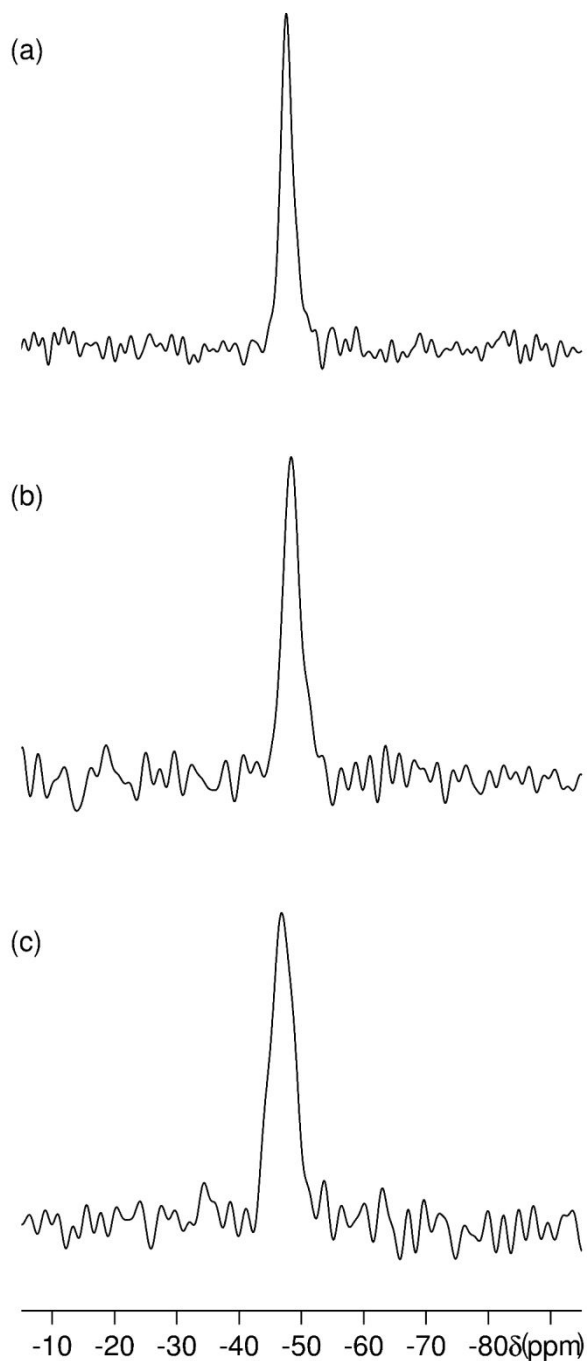

**Figure S6:**  $^{29}\text{Si}$  MAS NMR spectra (16.4 T, 10 kHz MAS) of  $\beta'$ -sialons, (a)  $z = 1$ , (b)  $z = 2$ , and (c)  $z = 4$ .

## S6. $^{27}\text{Al}$ MAS NMR spectra, 3Q projections and summary of 1D MAS NMR parameters

$^{27}\text{Al}$  MAS NMR spectra and corresponding projections from the  $^{27}\text{Al}$  MQMAS spectra are shown in Figure S7.

|       | 16.4 T                              |                                                                    | 20.0 T                              |                                                                    |
|-------|-------------------------------------|--------------------------------------------------------------------|-------------------------------------|--------------------------------------------------------------------|
|       | Peak max.<br>(ppm)<br>( $\pm 0.5$ ) | Full width at half max.<br>in ppm, (in Hz)<br>$\pm 1.0/(\sim 100)$ | Peak max.<br>(ppm)<br>( $\pm 0.5$ ) | Full width at half max.<br>in ppm, (in Hz)<br>$\pm 1.0/(\sim 100)$ |
| z = 1 | 72.9                                | 43.3 (7900)                                                        | 79.3                                | 36.1 (8000)                                                        |
| z = 2 | 70.1                                | 37.9 (6900)                                                        | 74.9                                | 30.3 (6700)                                                        |
| z = 4 | 70.7                                | 31.5 (5750)                                                        | 77.5                                | 32.0 (7100)                                                        |

**Table S3:** Position of peak maxima and full width at half maximum of  $^{27}\text{Al}$  MAS NMR spectra.



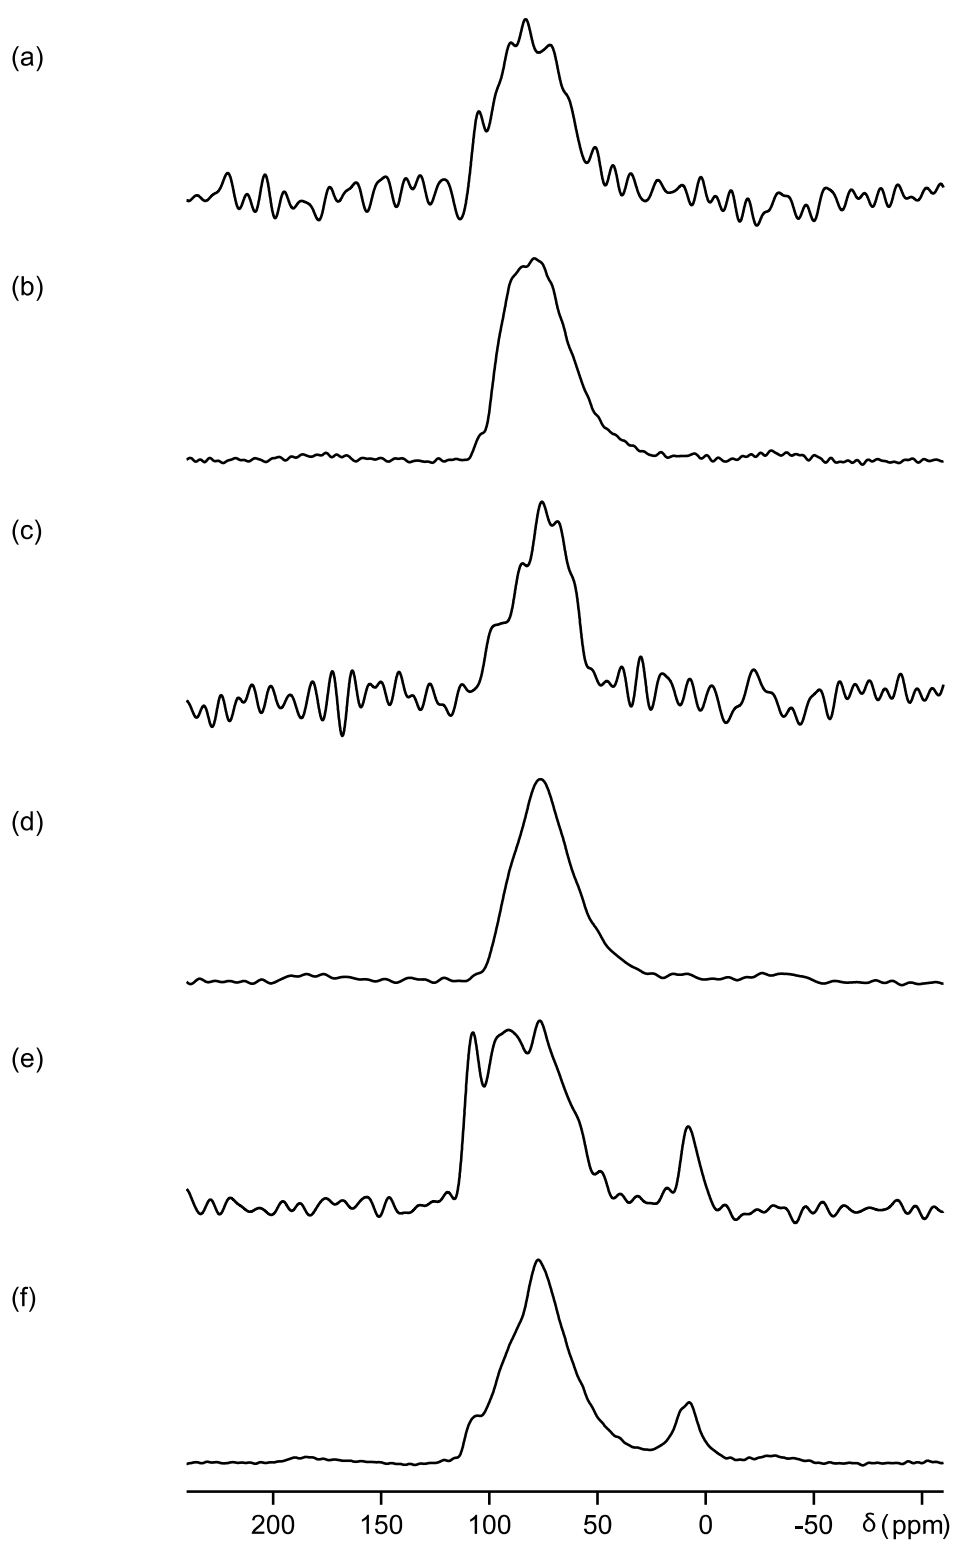

**Figure S7:**  $^{27}\text{Al}$  spectra (20.0 T, 25 kHz MAS) for (a,b)  $z = 1$ , (c,d)  $z = 2$ , and (e,f)  $z = 4$ . (a,c,e) 1D sum projections from MQ MAS spectra and (b,d,f) 1D MAS NMR spectra.

## S7 Experimental and calculated cell parameters and volumes as a function of z in $\beta'$ -sialons

The experimental unit cell parameters were compared to the geometry-optimised model structures. Figure S8 shows the trend in experimental unit cell parameters; the unit cell lengths, and volume, increase across the series as the content of Al/O increases. Figure S9 shows the change in unit cell parameters (as a % difference from the parent  $\beta$ - $\text{Si}_3\text{N}_4$ ) for the geometry-optimised structures of the different models. For  $z = 4$ , two domain 116 models were examined (labelled i and ii), with variation at the interface region. As can be seen in Figure S2, the domain 116ii model distorted after geometry optimisation, resulting in an  $\text{AlO}_3\text{N}_2$  site. The geometry optimisation for this model was rerun using the geometry-optimised domain 116i model as the starting structure, but again a defect structure was obtained. The NMR parameters for the former version of this model are reported in this work. For  $z = 4$ , another defect occurred in the geometry-optimised structure of the plane 221 model,  $\text{AlO}_4\text{N}$ .

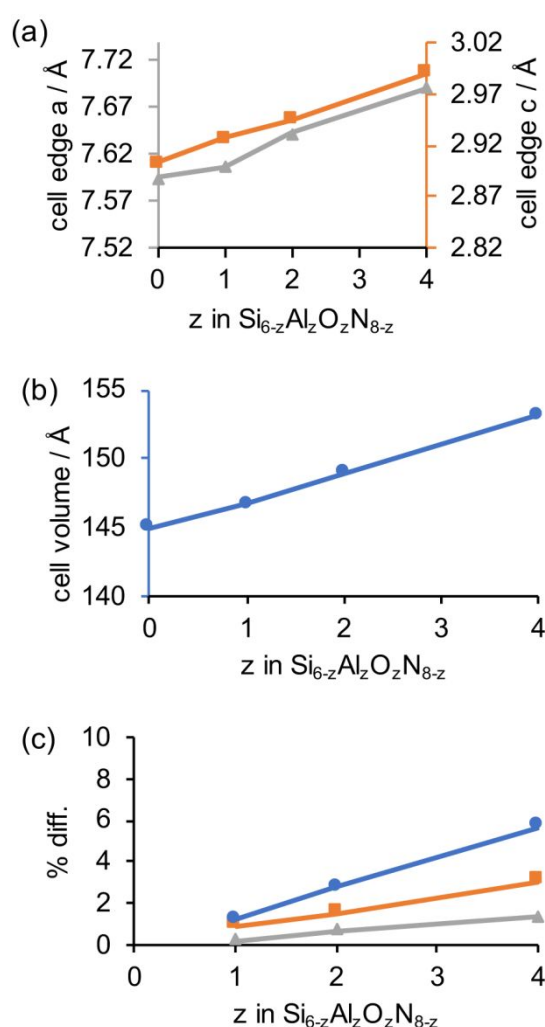

**Figure S8:** Experimental unit cell information from across the  $\beta'$ -sialon series studied in this work.<sup>1-3</sup> (a) Unit cell lengths,  $a$  and  $c$ , (b) unit cell volume, and (c) % difference of  $\beta'$ -sialon unit cell parameters compared to the parent  $\beta$ - $\text{Si}_3\text{N}_4$ . Blue circles: volume; gray triangles: cell length  $a$ ; orange squares: cell length  $c$ .

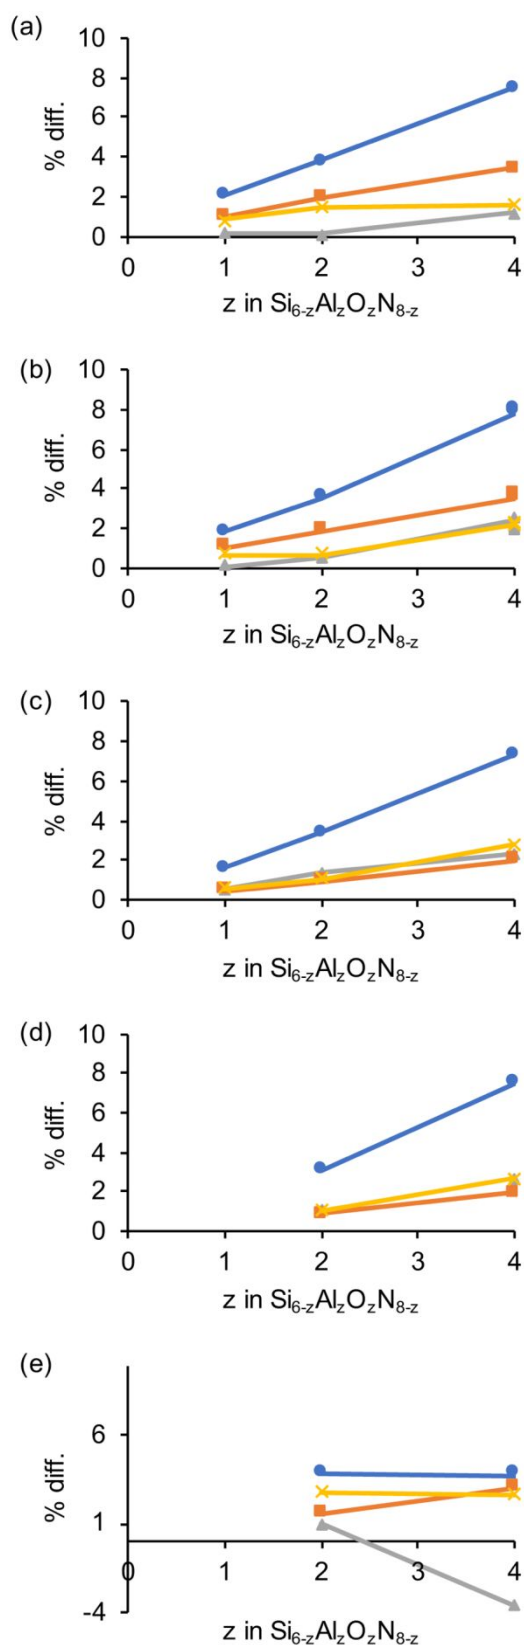

**Figure S9:** Unit cell (lengths and volume) changes (% compared to parent  $\beta\text{-Si}_3\text{N}_4$ ) for the various models (geometry-optimised structures) used in the computational study; (a) domain 113, (b) domain 116, (c) channel 231, (d) channel 331, (e) plane 221. Blue circles: volume; gray triangles: cell length  $a$ ; yellow crosses: cell length  $b$ ; orange squares: cell length  $c$ .

**S8 Calculated  $^{27}\text{Al}$  NMR interaction parameters for each individual model, their positions superimposed on 3Q MAS NMR and simulations of the MAS NMR spectra for possible different layer thicknesses**

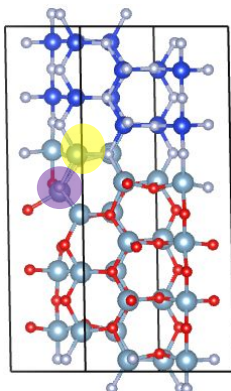

**Figure S10:**  $\text{AlN}_4$  site highlighted in yellow. Defect site highlighted in purple.

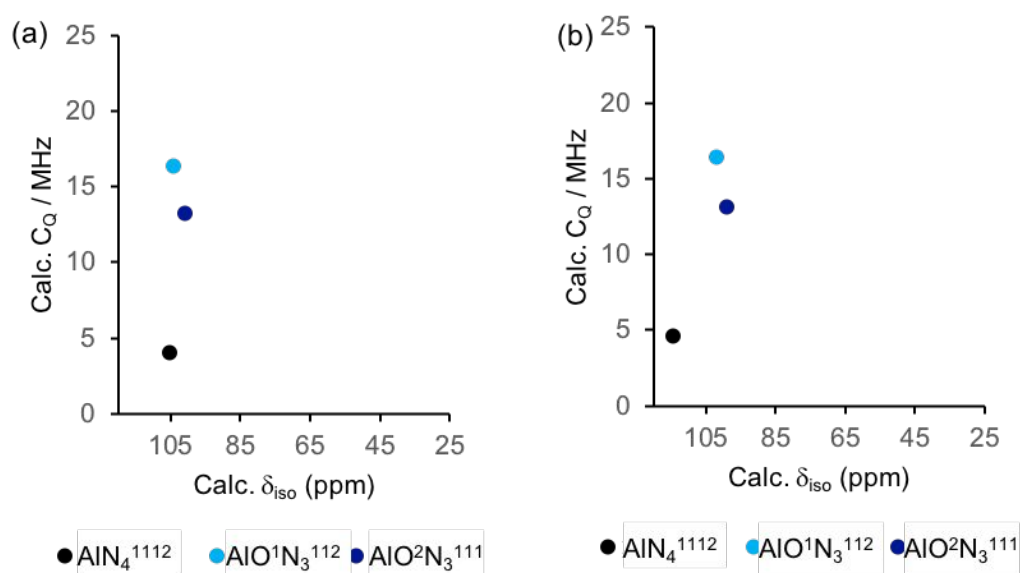

**Figure S11:** Plot of calculated (CASTEP)  $^{27}\text{Al}$  NMR parameters for isolated defects within a  $2 \times 2 \times 2$  unit cell of  $\beta\text{-Si}_3\text{N}_4$ , as studied in Ref. 9, a single Al/O substitution corresponding to  $\beta'$ -sialon with  $z = 0.125$ . Geometry optimisation carried out by: (a) atomic coordinates relaxed within a unit cell lattice parameters fixed to those of  $z = 0.075$ , following the computational method in Ref. 9, and (b) both atomic coordinates and unit cell allowed to relax, following the method of the present work.

A single Al/O substitution into the  $2 \times 2 \times 2$  supercell of  $\beta\text{-Si}_3\text{N}_4$  corresponds to  $\beta'$ -sialon with  $z = 0.125$ . The calculated  $^{27}\text{Al}$  NMR parameters are shown in the plot above. The  $C_Q$  values are similar to those reported in the plot in Ref. 9. For an isolated  $\text{AlN}_4$  site a  $C_Q$  of  $<5$  MHz is obtained. The  $C_Q$  calculated for  $\text{AlN}_4$  in one of the models for  $z = 4$  is large due to its through bond connectivity to an unintended defect site, obtained after geometry optimisation.

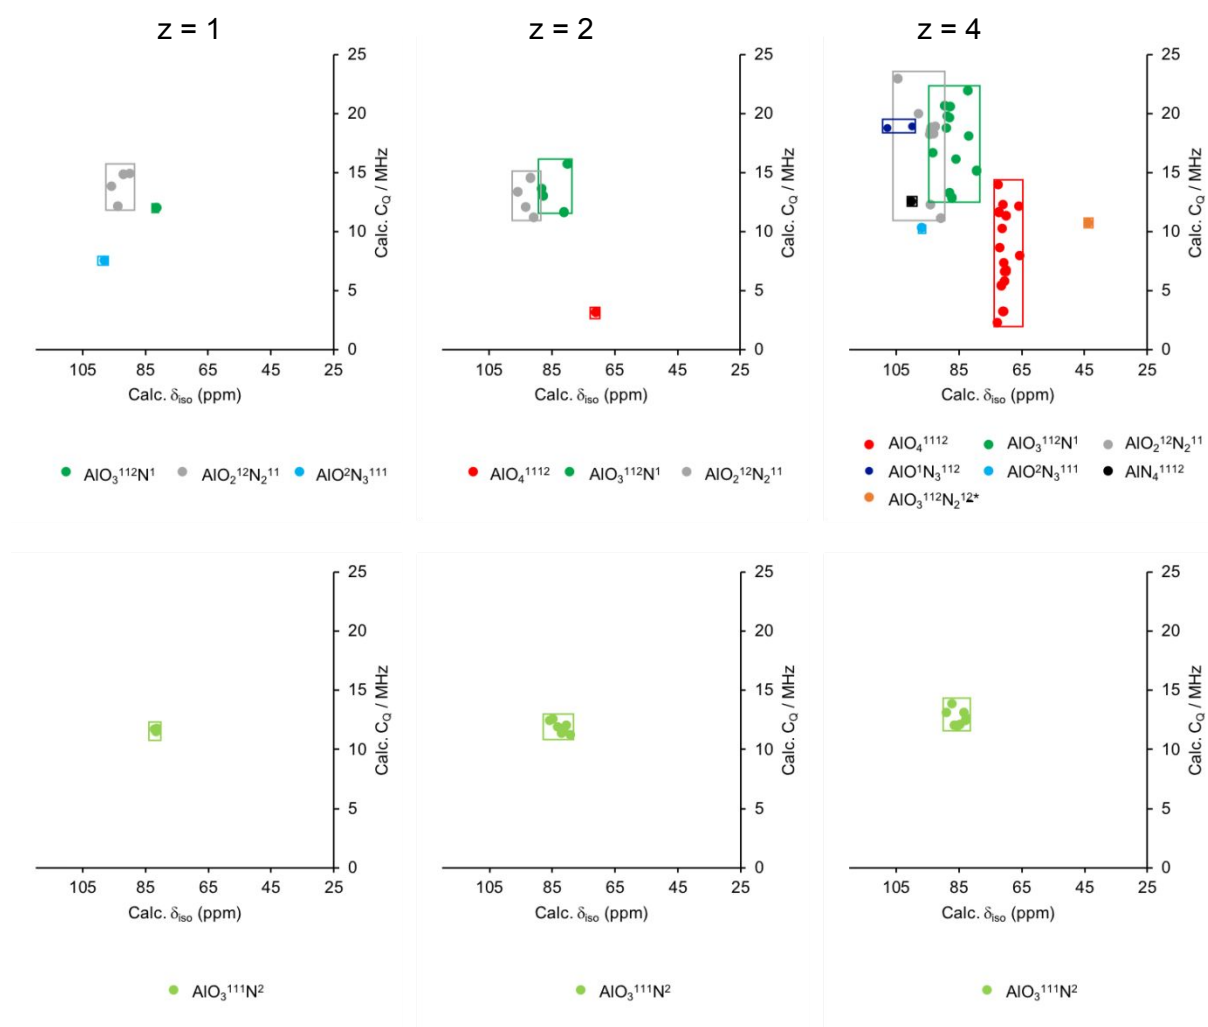

**Figure S12:** Plot of calculated (CASTEP)  $^{27}\text{Al}$  NMR parameters for (top) domain models, and (bottom) channel models, for  $z = 1$ ,  $z = 2$ , and  $z = 4$ .

| Model        | Local Al Environment                 | Calculated ranges of $^{27}\text{Al}$ $C_Q$ / MHz |
|--------------|--------------------------------------|---------------------------------------------------|
| <b>z = 1</b> |                                      |                                                   |
| Channel      | $\text{AlO}_3^{111}\text{N}^2$       | 11.5 - 11.8                                       |
| Domain       | $\text{AlO}^2\text{N}_3^{111}$       | 7.6                                               |
|              | $\text{AlO}_2^{12}\text{N}_2^{11}$   | 12.2 - 14.9                                       |
|              | $\text{AlO}_3^{112}\text{N}^1$       | 12.0                                              |
| <b>z = 2</b> |                                      |                                                   |
| Channel      | $\text{AlO}_3^{111}\text{N}^2$       | 11.2 - 12.6                                       |
| Domain       | $\text{AlO}_2^{12}\text{N}_2^{11}$   | 11.2 - 14.6                                       |
|              | $\text{AlO}_3^{112}\text{N}^1$       | 11.6 - 15.7                                       |
|              | $\text{AlO}_4^{1112}$                | 3.2                                               |
| <b>z = 4</b> |                                      |                                                   |
| Channel      | $\text{AlO}_3^{111}\text{N}^2$       | 12.0 - 13.9                                       |
| Domain       | $\text{AlN}_4^{1112}$                | 12.6                                              |
|              | $\text{AlO}^1\text{N}_3^{112}$       | 18.7 - 18.9                                       |
|              | $\text{AlO}^2\text{N}_3^{111}$       | 10.4                                              |
|              | $\text{AlO}_2^{12}\text{N}_2^{11}$   | 11.1 - 22.9                                       |
|              | $\text{AlO}_3^{112}\text{N}^1$       | 12.9 - 22.0                                       |
|              | $\text{AlO}_4^{1112}$                | 2.3 - 14                                          |
|              | $\text{AlO}_3^{112}\text{N}_2^{12*}$ | 10.8                                              |

**Table S4:** Calculated ranges of  $^{27}\text{Al}$   $C_Q$  values. The  $\text{AlN}_4^{1112}$  site, from model domain116ii, is connected, via  $\text{N}^2$  to the  $\text{AlO}_3^{112}\text{N}_2^{12*}$  defect site after geometry optimisation (Figure S10), resulting in the large  $C_Q$ .

$z = 1$

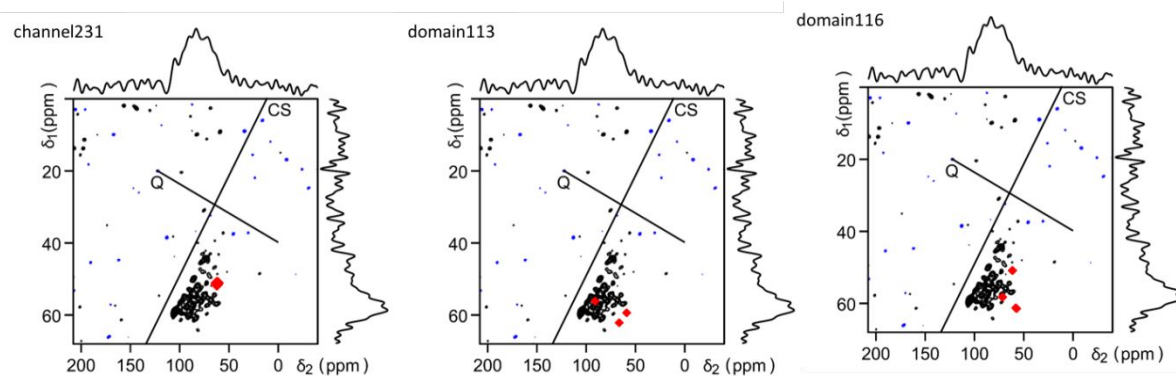

$z = 2$

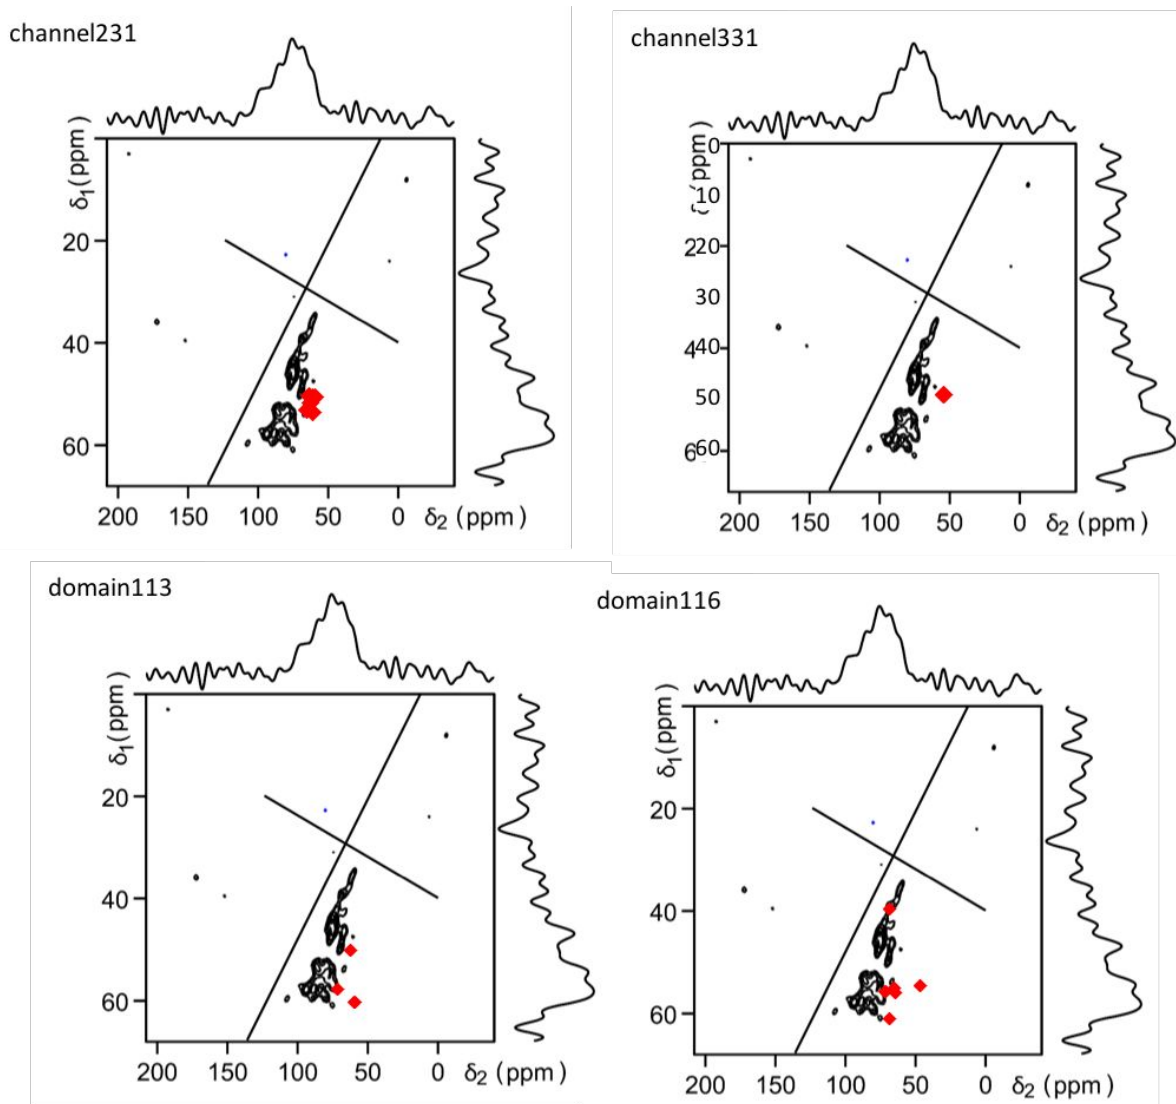

**Figure S13:** Comparison of 3Q MAS NMR data (20.0 T) with the expected position of the intensity for  $z = 1$  and  $z = 2$   $\beta'$ -sialons for different structural models. Red diamonds = MQMAS centre-of-gravity of CASTEP calculated  $^{27}\text{Al}$  NMR parameters. Spread of data supports single layer thickness for  $z = 1$  (domain 116 model).

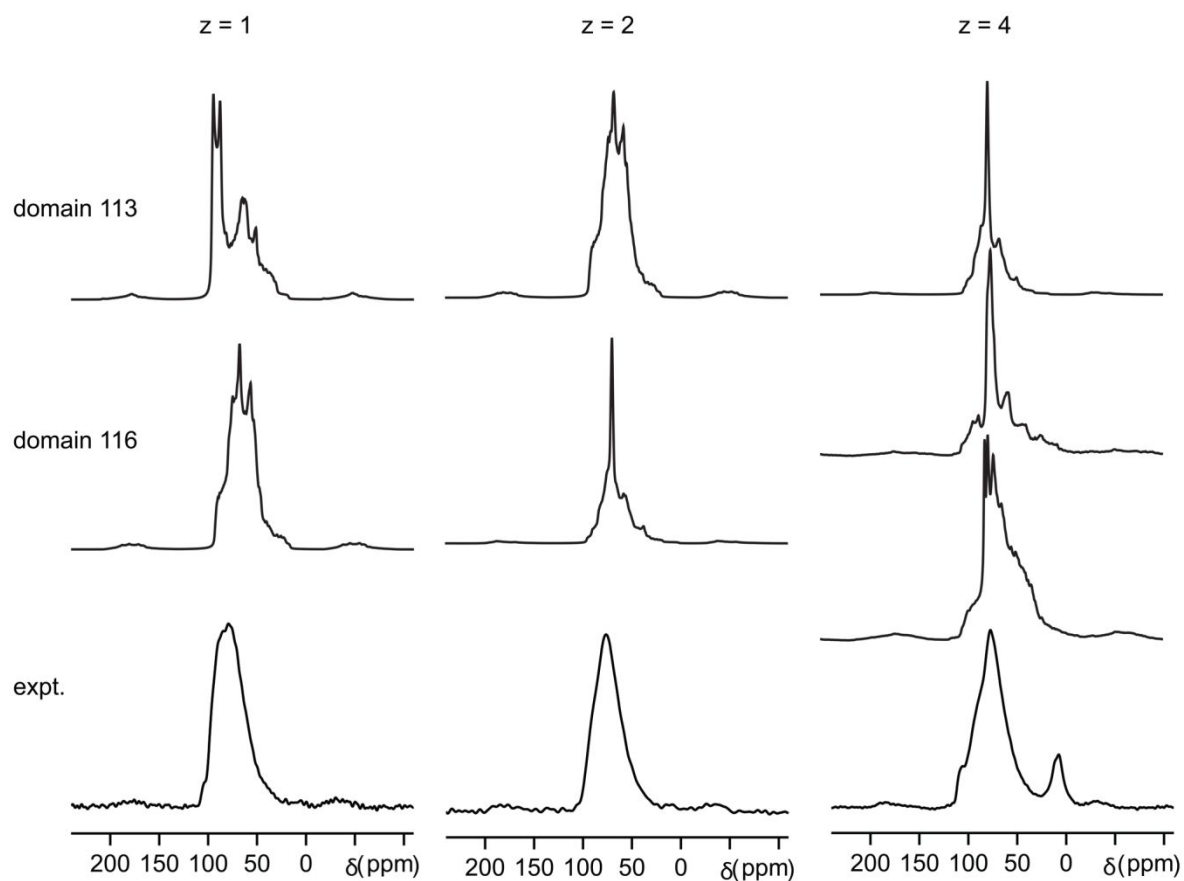

**Figure S14:** Experimental and simulated spectra (20.0 T, 25 kHz MAS) for  $z = 1, 2$ , and  $4$ . Spectra were simulated using SIMPSON, using the NMR parameters calculated by CASTEP for the domain models. The two domain 116 models correspond to those shown in Figure S2.



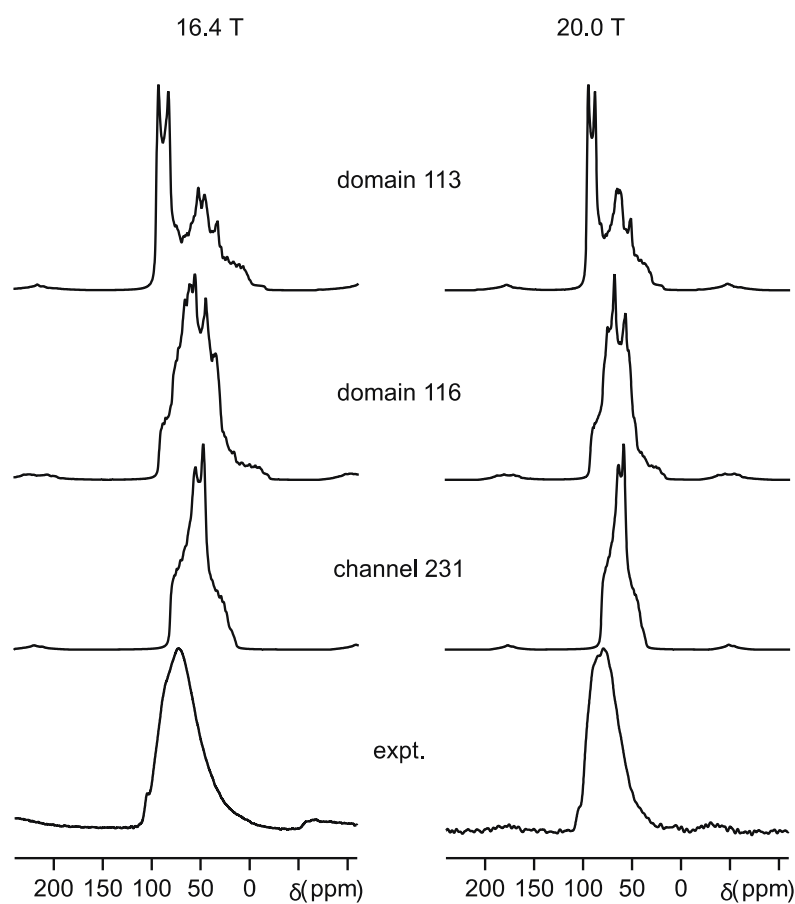

**Figure S15:** Experimental and simulated spectra (16.4 T, 30 kHz MAS; 20.0 T, 25 kHz MAS) for  $z = 1$ . Spectra were simulated using SIMPSON, using the NMR parameters calculated by CASTEP for the domain and channel models.

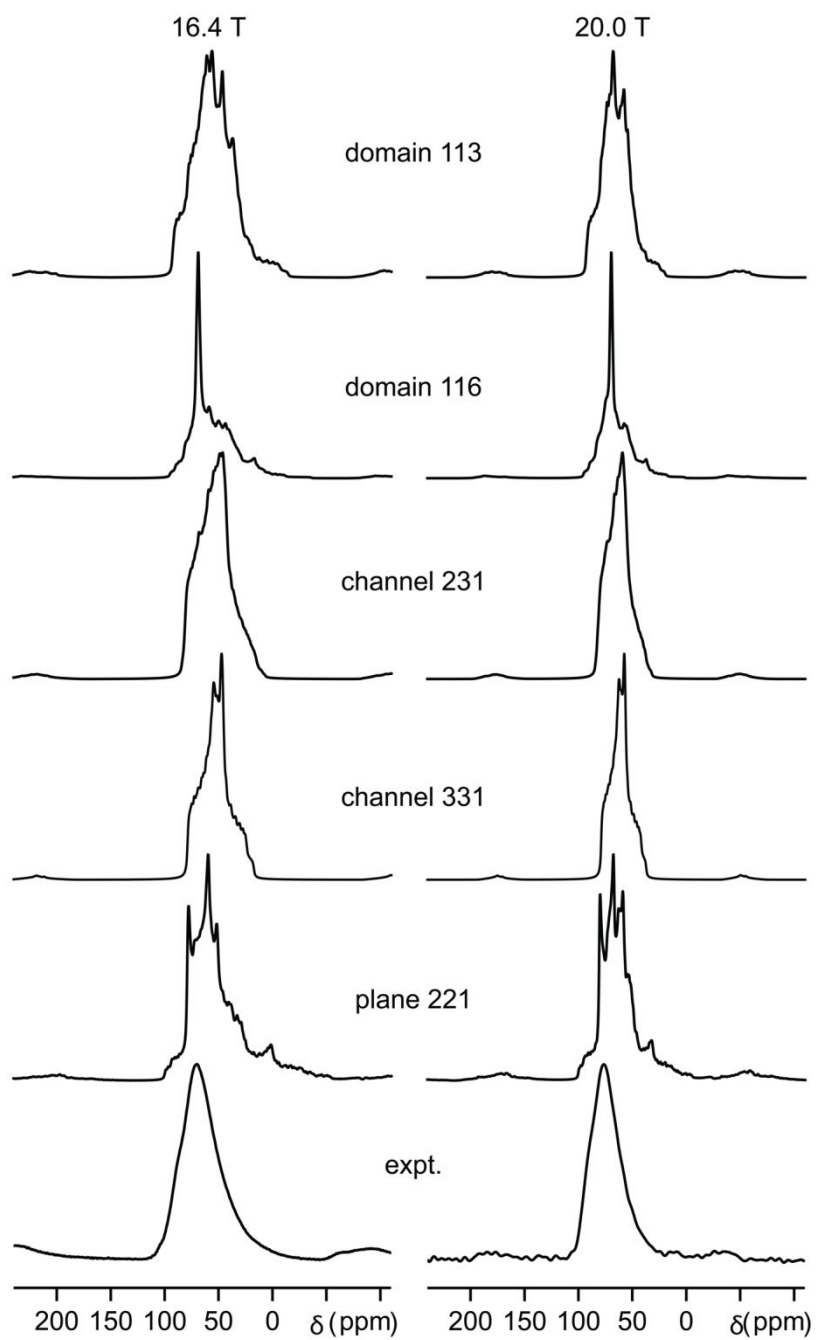

**Figure S16:** Experimental and simulated spectra (16.4 T, 30 kHz MAS; 20.0 T, 25 kHz MAS) for  $z = 2$ . Spectra were simulated using SIMPSON, using the NMR parameters calculated by CASTEP for the domain, channel and plane models.

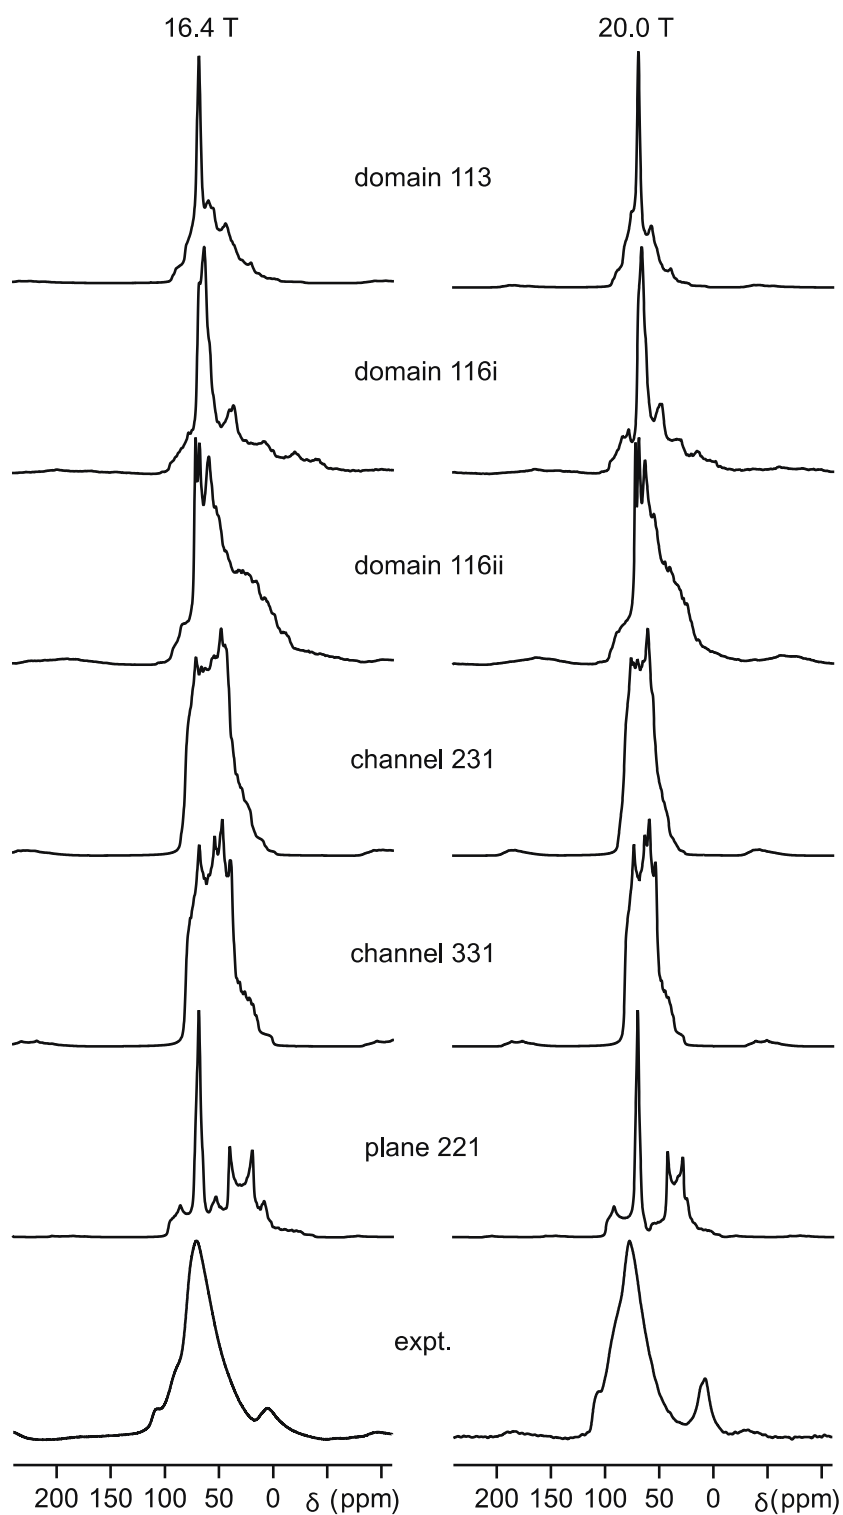

**Figure S17:** Experimental and simulated spectra (16.4 T, 30 kHz MAS; 20.0 T, 25 kHz MAS) for  $z = 4$ . Spectra were simulated using SIMPSON, using the NMR parameters calculated by CASTEP for the domain, channel and plane models.

## S9. Example SIMPSON input files

SIMPSON simulations (SIMPSON version 4.2.1)<sup>14</sup> were carried out for the CASTEP-calculated NMR parameters (chemical shift and quadrupolar parameters,  $C_Q$  and  $\eta_Q$ ) for each of the models. Example SIMPSON input files are given below. The first is for the channel model of  $z = 1$  at 16.4 T with 30 kHz MAS (z1\_channel231\_700\_30.in), and the second is for a domain model of  $z = 1$  at 20.0 T with 25 kHz MAS (z1\_domain116\_850\_25.in), similar to experimental conditions. The zcw4180 crystal file was used for imitating the powder averaging.

## z1\_channel231\_700\_30.in

```

# Efficient simulation of MAS quadrupole and CSA
# spectrum of several independent
# nuclei.
#
# Initial density operator is Ix, i.e., ideal excitation
# assumed.
# Only the central transition is 'observed'.
#
# The parameters for each nucleus are set in the
# 'proc main {} { .. }' section of the input file.
#
# The relative contribution of each nucleus to the
# spectrum is specified by the weight parameter.
# The relative orientation of the CSA and
# quadrupole coupling tensors is specified by taking
# the
# quadrupole tensor as coincident with the crystal
# frame and only specifying the chemical shift tensor
# orientation.

spinsys {
  channels 27Al
  nuclei 27Al
  shift 1 $par(CSiso) $par(CSaniso) $par(CSeta)
  $par(alpha) $par(beta) $par(gamma)
  quadrupole 1 2 $par(CQ) $par(etaQ) 0
  0 0
}

par {
  start_operator I1x
  detect_operator I1c
  spin_rate 30000
  gamma_angles 40
  sw 300000
  crystal_file zcw4180
  np 1024
  proton_frequency 700e6
  verbose 111

  variable tdwell 1.0e6/sw
}

proc pulseseq {} {
  global par

  reset
  acq
  for {set i 1} {$i < $par(np)} {incr i} {
    delay $par(tdwell)
    acq
  }

  proc main {} {
    global par

    # create a dataset of zeros
    set f [fcreate -np $par(np) -sw $par(sw)]

    # C_Q eta_Q CSiso CSaniso CSeta a b
    g weight
    foreach Spin_pars {{11.51e6 0.7 14913.816 0 0 0
    0 0 2}
    {11.76e6 0.72 14853.61344 0 0 0 0 2}
    {11.71e6 0.74 15001.38336 0 0 0 0 2}} {
      # Note the position of the brackets at the end of
      # the above line. There must be a single
      # space between two braces otherwise the
      # foreach command doesn't work. Strange!
      #
      set par(CQ) [lindex $Spin_pars 0]
      set par(etaQ) [lindex $Spin_pars 1]
      set par(CSiso) [lindex $Spin_pars 2]
      set par(CSaniso) [lindex $Spin_pars 3]
      set par(CSeta) [lindex $Spin_pars 4]
      set par(alpha) [lindex $Spin_pars 5]
      set par(beta) [lindex $Spin_pars 6]
      set par(gamma) [lindex $Spin_pars 7]
      set par(weight) [lindex $Spin_pars 8]

      # run the simulation for each site
      set g [fsimpson]

      # weight each site as required
      fexpr $g $par(weight)*\Sre $par(weight)*\Sim

      # add the sites together
      fadd $f $g
    }

    fsave $f $par(name).fid
    fzerofill $f 8192
    fadddb $f 300 0
    fft $f
    fsave $f $par(name).spe
  }
}

```

## z1\_domain116\_850\_25.in

```

# Efficient simulation of MAS quadrupole and CSA
# spectrum of several independent
# nuclei.
#
# Initial density operator is Ix, i.e., ideal excitation
# assumed.
# Only the central transition is 'observed'.
#
# The parameters for each nucleus are set in the
# 'proc main {} { .. }' section of the input file.
#
# The relative contribution of each nucleus to the
# spectrum is specified by the weight parameter.
# The relative orientation of the CSA and
# quadrupole coupling tensors is specified by taking
# the
# quadrupole tensor as coincident with the crystal
# frame and only specifying the chemical shift tensor
# orientation.

spinsys {
  channels 27Al
  nuclei 27Al
  shift 1 $par(CSiso) $par(CSaniso) $par(CSeta)
  $par(alpha) $par(beta) $par(gamma)
  quadrupole 1 2 $par(CQ) $par(etaQ) 0
  0 0
}

par {
  start_operator I1x
  detect_operator I1c
  spin_rate 25000
  gamma_angles 40
  sw 300000
  crystal_file zcw4180
  np 1024
  proton_frequency 850e6
  verbose 111

  variable tdwell 1.0e6/sw
}

proc pulseseq {} {
  global par

  reset
  acq
  for {set i 1} {$i < $par(np)} {incr i} {
    delay $par(tdwell)
    acq
  }
}

}

}

proc main {} {
  global par

  # create a dataset of zeros
  set f [fcreate -np $par(np) -sw $par(sw)]

  # C_Q eta_Q CSiso CSaniso CSeta a b
  g weight
  foreach Spin_pars {{14.88e6 0.85 20406.14604 0
0 0 0 1}
{12.00e6 0.48 18042.55965 0 0 0 0 1}
{12.19e6 0.7 20758.35807 0 0 0 0 1}
{14.88e6 0.86 20401.7157 0 0 0 0 1}
{12.00e6 0.48 18046.98999 0 0 0 0 1}
{12.18e6 0.69 20760.57324 0 0 0 0 1}} {
    # Note the position of the brackets at the end of
    # the above line. There must be a single
    # space between two braces otherwise the
    # foreach command doesn't work. Strange!
    #
    set par(CQ) [lindex $Spin_pars 0]
    set par(etaQ) [lindex $Spin_pars 1]
    set par(CSiso) [lindex $Spin_pars 2]
    set par(CSaniso) [lindex $Spin_pars 3]
    set par(CSeta) [lindex $Spin_pars 4]
    set par(alpha) [lindex $Spin_pars 5]
    set par(beta) [lindex $Spin_pars 6]
    set par(gamma) [lindex $Spin_pars 7]
    set par(weight) [lindex $Spin_pars 8]

    # run the simulation for each site
    set g [fsimpson]

    # weight each site as required
    fexpr $g $par(weight)*\Re $par(weight)*\Sim

    # add the sites together
    fadd $f $g
  }

  fsave $f $par(name).fid
  fzerofill $f 8192
  faddlb $f 300 0
  fft $f
  fsave $f $par(name).spe
}

```

## S10. References

- [1] Gruen, R. The crystal structure of beta-Si<sub>3</sub>N<sub>4</sub>; structural and stability considerations between alpha- and beta-Si<sub>3</sub>N<sub>4</sub>. *Acta Crystallographica, Section B: Structural Crystallography and Crystal Chemistry* **1979**, *35*, 800-804.
- [2] Khvatinskaya, D.Y.; Em, V.V.T.; Loryan, E.; Smirnov, K.L. A neutron diffraction study on the structure of β'-sialon. *Inorg. Mater.* **1991**, *27*, 1805-1807.
- [3] Gillott, L.; Cowlam, N.; Bacon, G.E. A neutron diffraction investigation of some β'-sialons, *J. Mater. Sci.* **1981**, *16*, 2263-2268.
- [4] Momma, K.; Izumi, F. VESTA 3 for three-dimensional visualization of crystal, volumetric and morphology data. *J. Appl. Crystallogr.*, **2011**, *44*, 1272-1276.
- [5] Harris, R.K.; Leach, M.J.; Thompson D.P. Synthesis and magic-angle spinning nuclear magnetic resonance of <sup>15</sup>N-enriched silicon nitrides. *Chem. Mater.* **1990**, *3*, 320-323.
- [6] Dupree, R.; Lewis, M.H.; Leng-Ward, G.; Williams, D.S. Coordination of Si atoms in silicon oxynitrides determined by magic-angle-spinning NMR. *J. Mater. Sci. Lett.* **1985**, *4*, 393-395.
- [7] Carduner, K.R.; Carter, R.O.; Millberg M.E.; Crosbie, G.M. Determination of phase-composition of silicon-nitride powders by <sup>29</sup>Si magic angle spinning nuclear-magnetic-resonance spectroscopy. *Anal. Chem.* **1987**, *59*, 2794-2797.
- [8] Carduner, K.R.; Blackwell, C.S.; Hammond, W.B.; Reidinger, F.; Hatfield, G.R. <sup>29</sup>Si NMR characterization of α-silicon and β-silicon nitride. *J. Am. Chem. Soc.* **1990**, *112*, 4676-4679.
- [9] Cozzan, C.; Griffith, K.J.; Laurita, G.; Hu, J.G.; Grey, C.P.; Seshadri, R. Structural Evolution and Atom Clustering in β-SiAlON: β-Si<sub>6-z</sub>Al<sub>z</sub>O<sub>z</sub>N<sub>8-z</sub>. *Inorg. Chem.* **2017**, *56*, 2153-2158.
- [10] Sjöberg, J.; Harris R.K.; Apperley D.C. <sup>29</sup>Si, <sup>27</sup>Al and <sup>15</sup>N magic-angle spinning nuclear magnetic resonance of O'-sialons and some related phases. *J. Mater. Chem.* **1992**, *2*, 433-438.
- [11] Dupree, R.; Lewis M.H.; Smith, M.E. Structural characterization of ceramic phases with high-resolution <sup>27</sup>Al NMR. *J. Appl. Cryst.* **1988**, *21*, 109-116.
- [12] Smith, M.E. Observation of mixed Al(O,N)<sub>4</sub> structural units by <sup>27</sup>Al magic angle spinning NMR. *J. Phys. Chem.* **1992**, *96*, 1444-1448.
- [13] (a) Rocha, J. Direct observation of highly distorted hexa-coordinated aluminium in andalusite by very fast Al-27 MAS NMR. *Chem. Commun.* **1998**, 2489-2490. (b) . Harris, R.K.; Leach, M.J.; Thompson, D.P. Synthesis and magic-angle-spinning nuclear-magnetic resonance of <sup>15</sup>N-enriched silicon nitrides. *Chem. Mater.* **1990**, *2*, 320-323. (c) Jakobsen, H.J.; Skibsted, J.; Bildsøe, H.; Nielsen, N.C. Magic-angle spinning NMR spectra of satellite transitions for quadrupolar nuclei in solids. *J. Magn. Reson.* **1989**, *85*, 173-180. (d) Smith, J.V.; Blackwell, C.S. Nuclear magnetic resonance of silica polymorphs. *Nature* **1983**, *303*, 223-225. (e) Profeta, M.; Mauri, F.; Pickard, C.J. Accurate first principles prediction of O-17 NMR parameters in SiO<sub>2</sub>: Assignment of the zeolite ferrierite spectrum. *J. Am. Chem. Soc.* **2003**, *125*, 541-548.
- [14] Bak, M.; Rasmussen, J.T.; Nielsen, N.C. SIMPSON: A General Simulation Program for Solid-State NMR Spectroscopy, *J. Magn. Reson.*, **2000**, *147*, 296.
